# Supplementary material
Source: PubMed Central journal article supplement (PMC4084646)

**A**

Castration of *Pten/ Trp53* mutant animals (n=7)

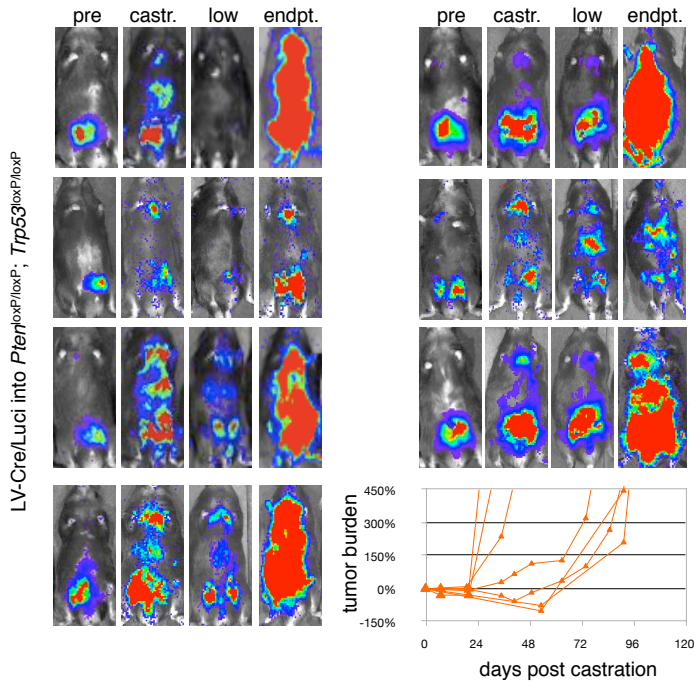

**C**

Spider plot of castration trials

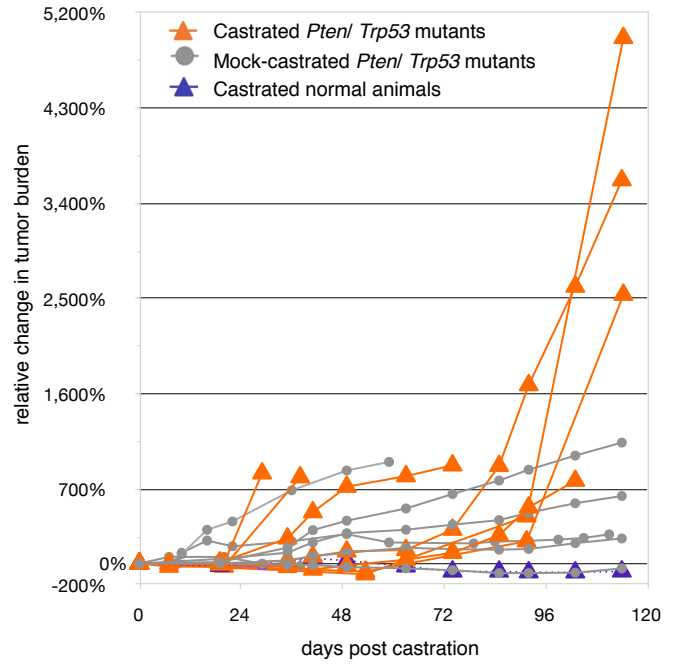

**B**

Mock-castration of *Pten/ Trp53* mutant animals (n=7)

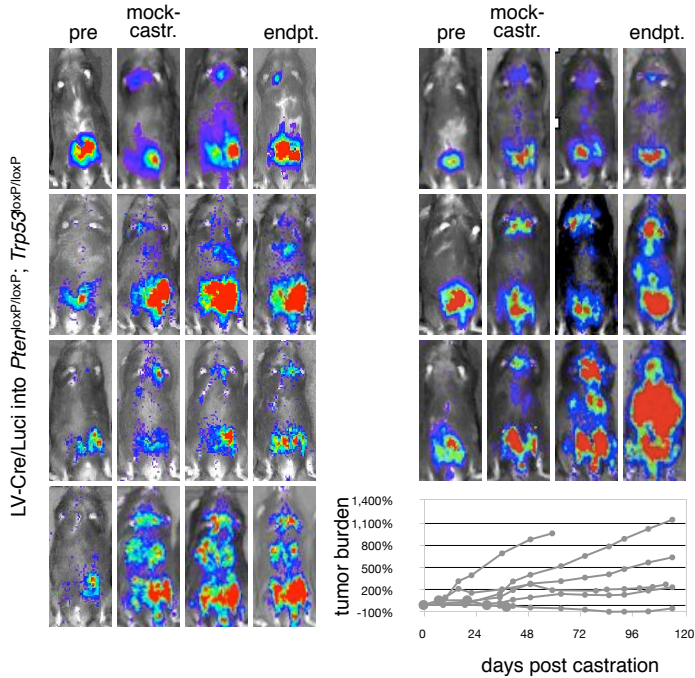

Castration of normal prostate (n=2)

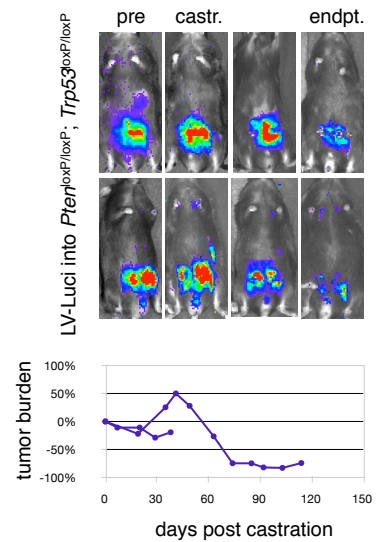

Supplement: NIHMS556897-supplement-S5.pdf [file NIHMS556897-supplement-S5.pdf]
