# Supplementary material
Source: PubMed Central journal article supplement (PMC4084646)

**A**

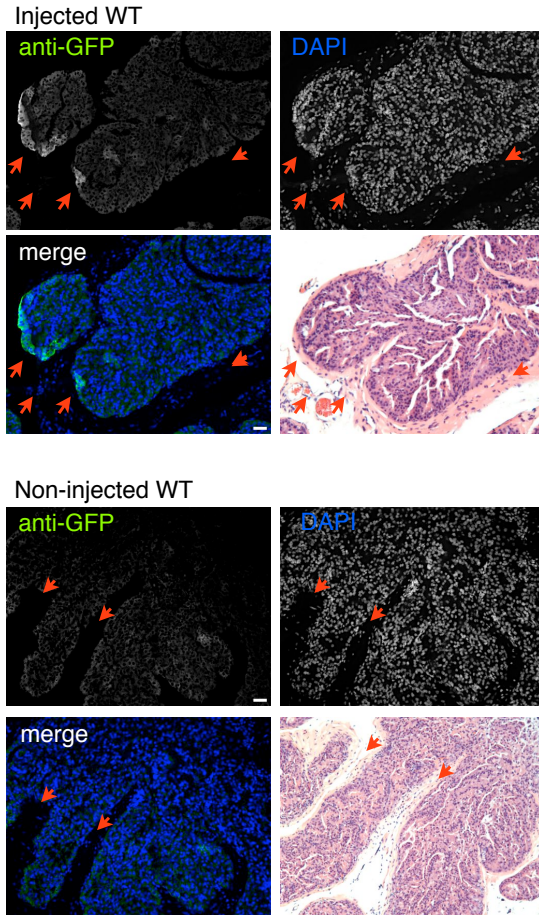

**B**

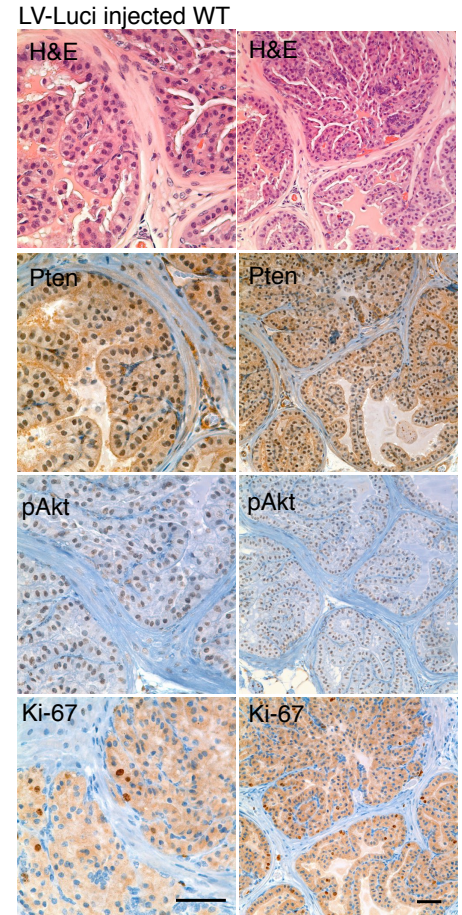

**C**

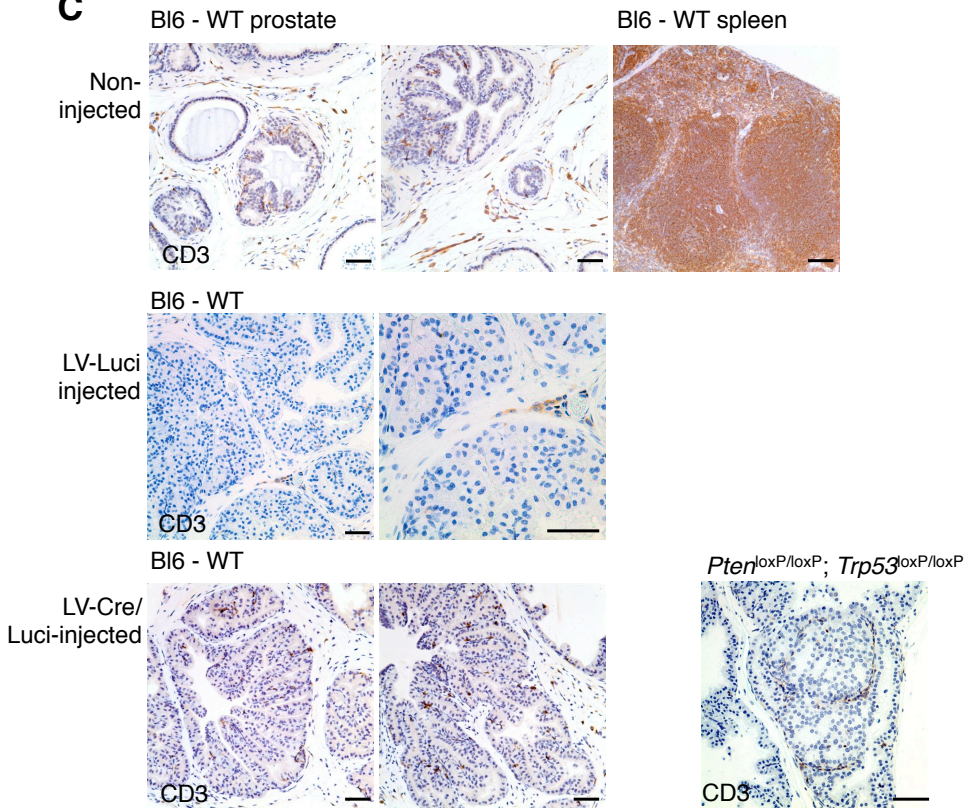

Supplement: NIHMS556897-supplement-S1.pdf [file NIHMS556897-supplement-S1.pdf]

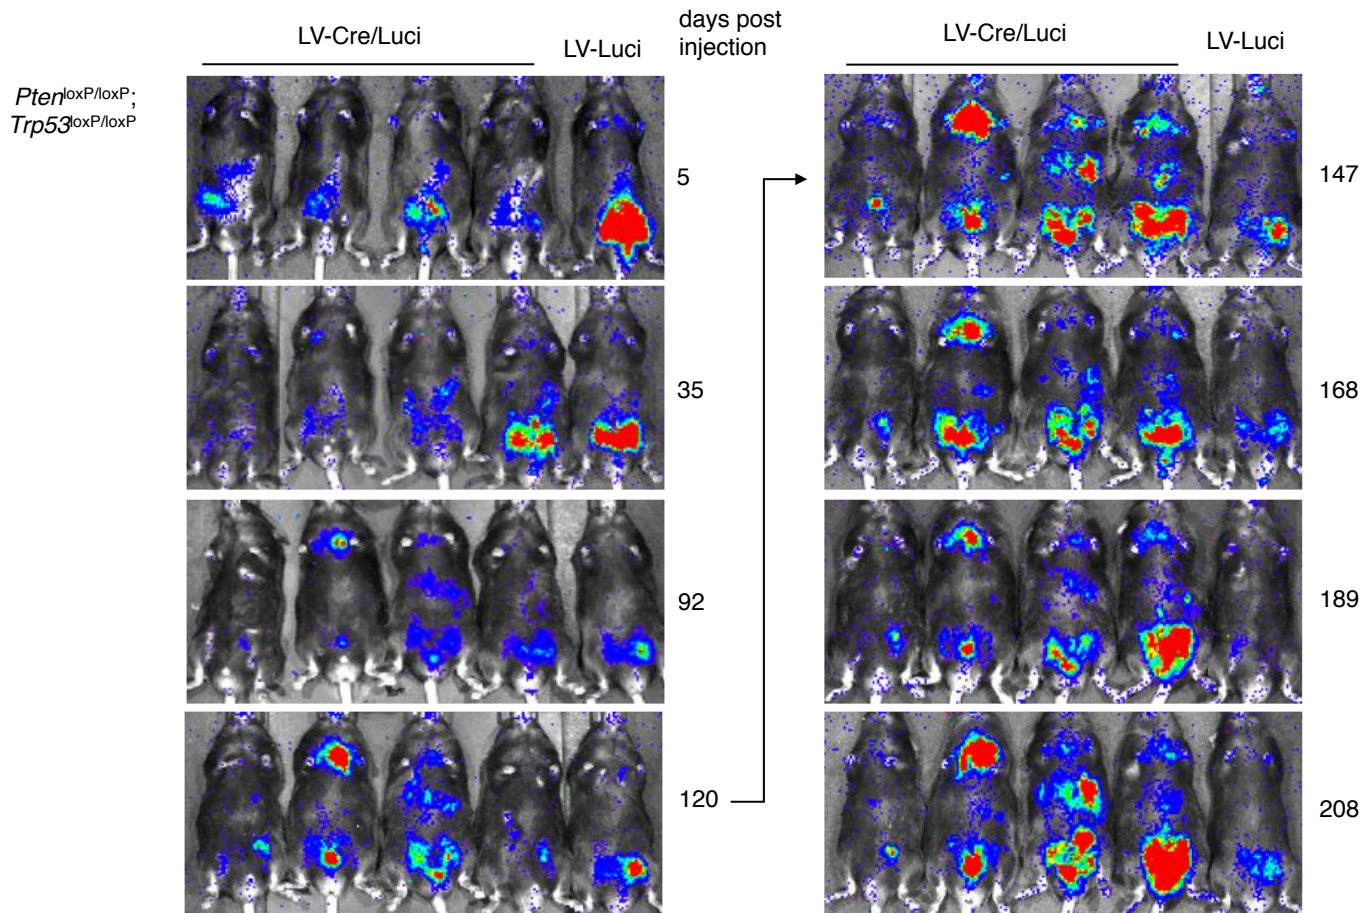

Supplement: NIHMS556897-supplement-S2.pdf [file NIHMS556897-supplement-S2.pdf]

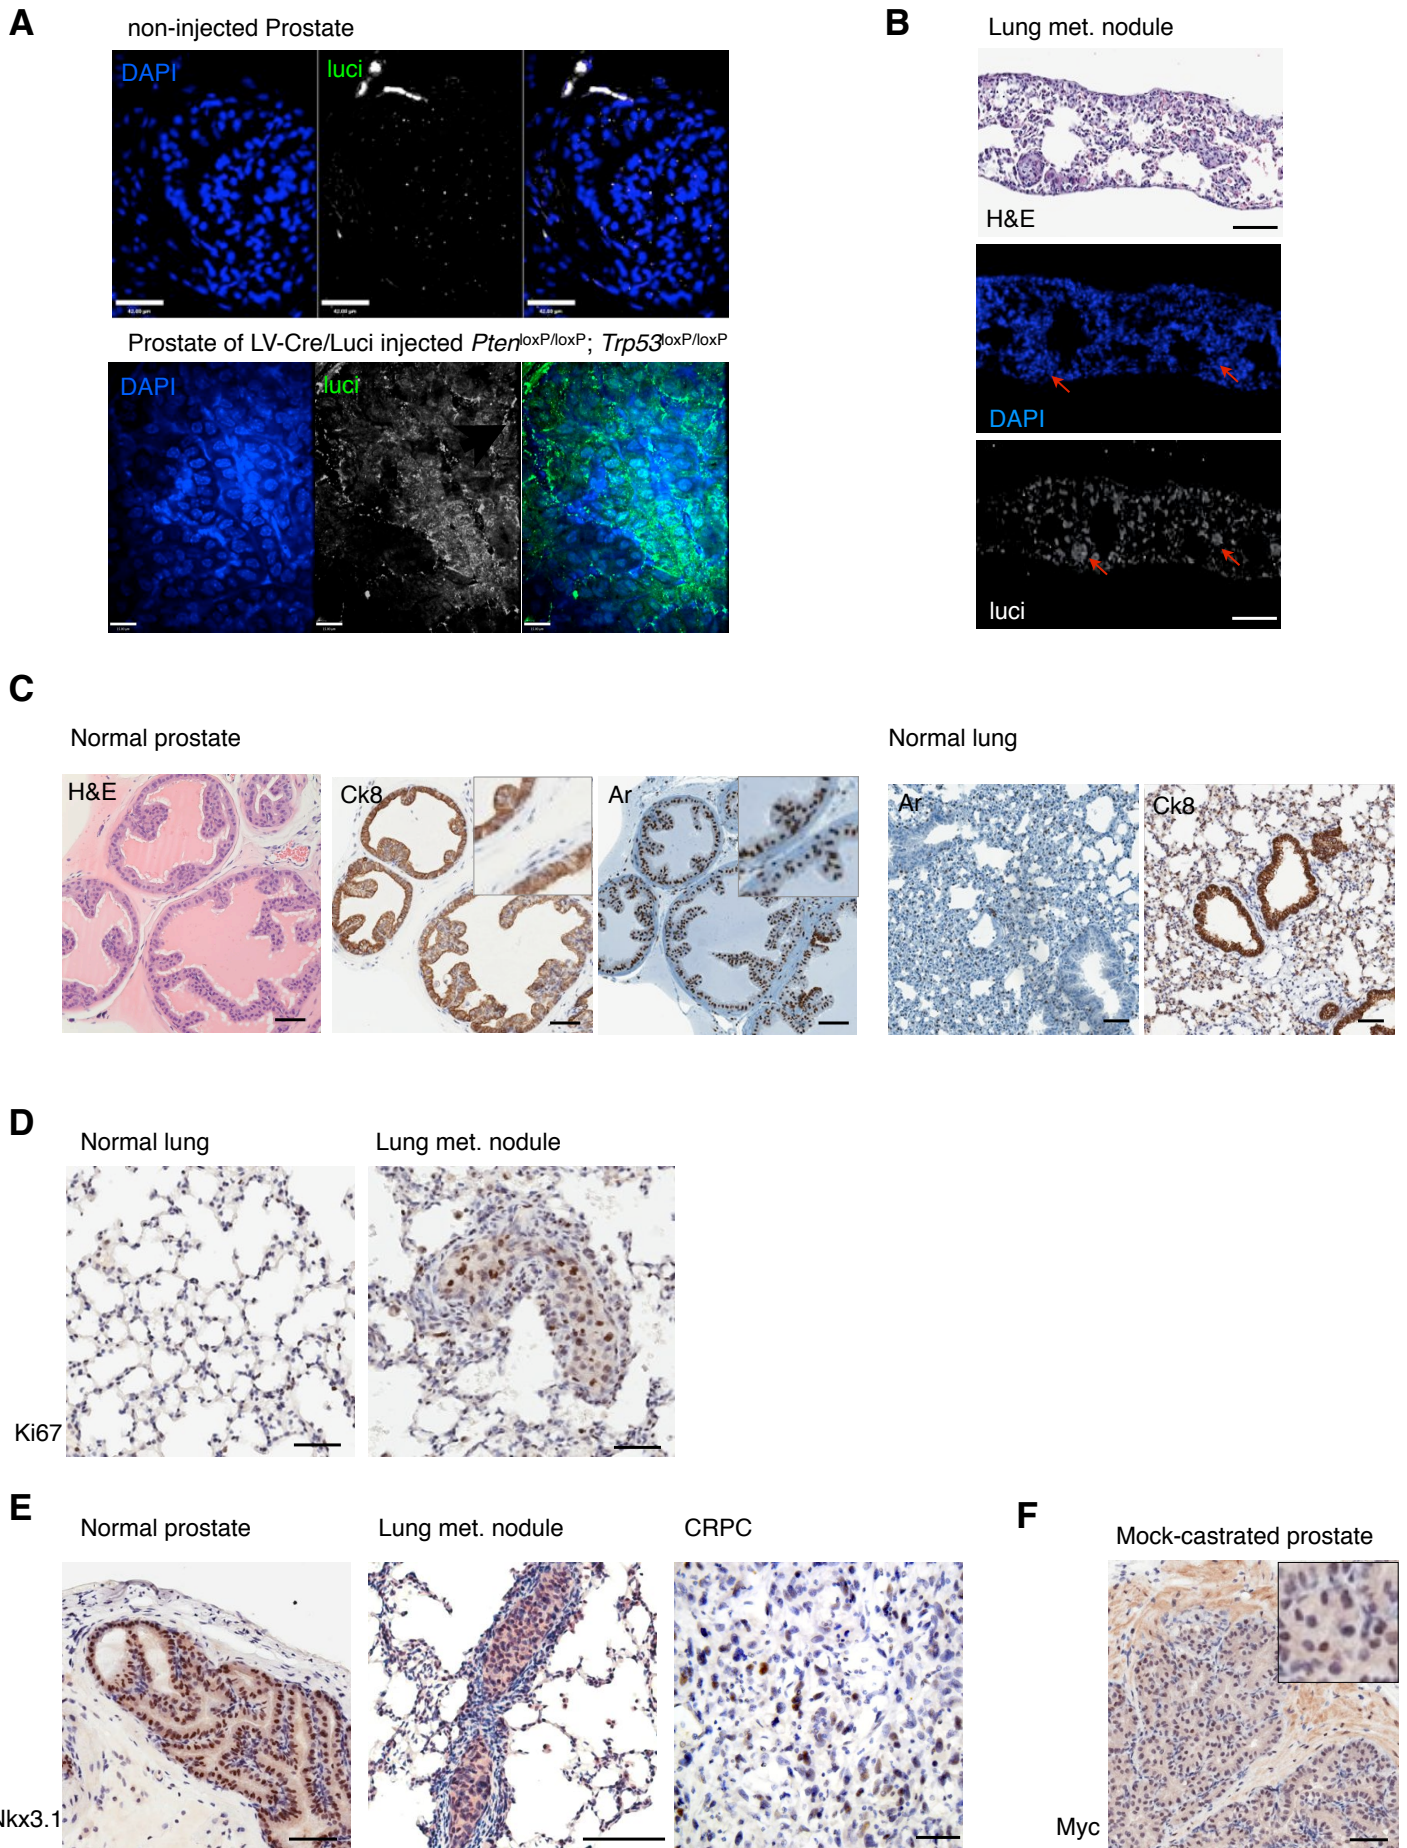

Supplement: NIHMS556897-supplement-S3.pdf [file NIHMS556897-supplement-S3.pdf]

Lung metastasis summary

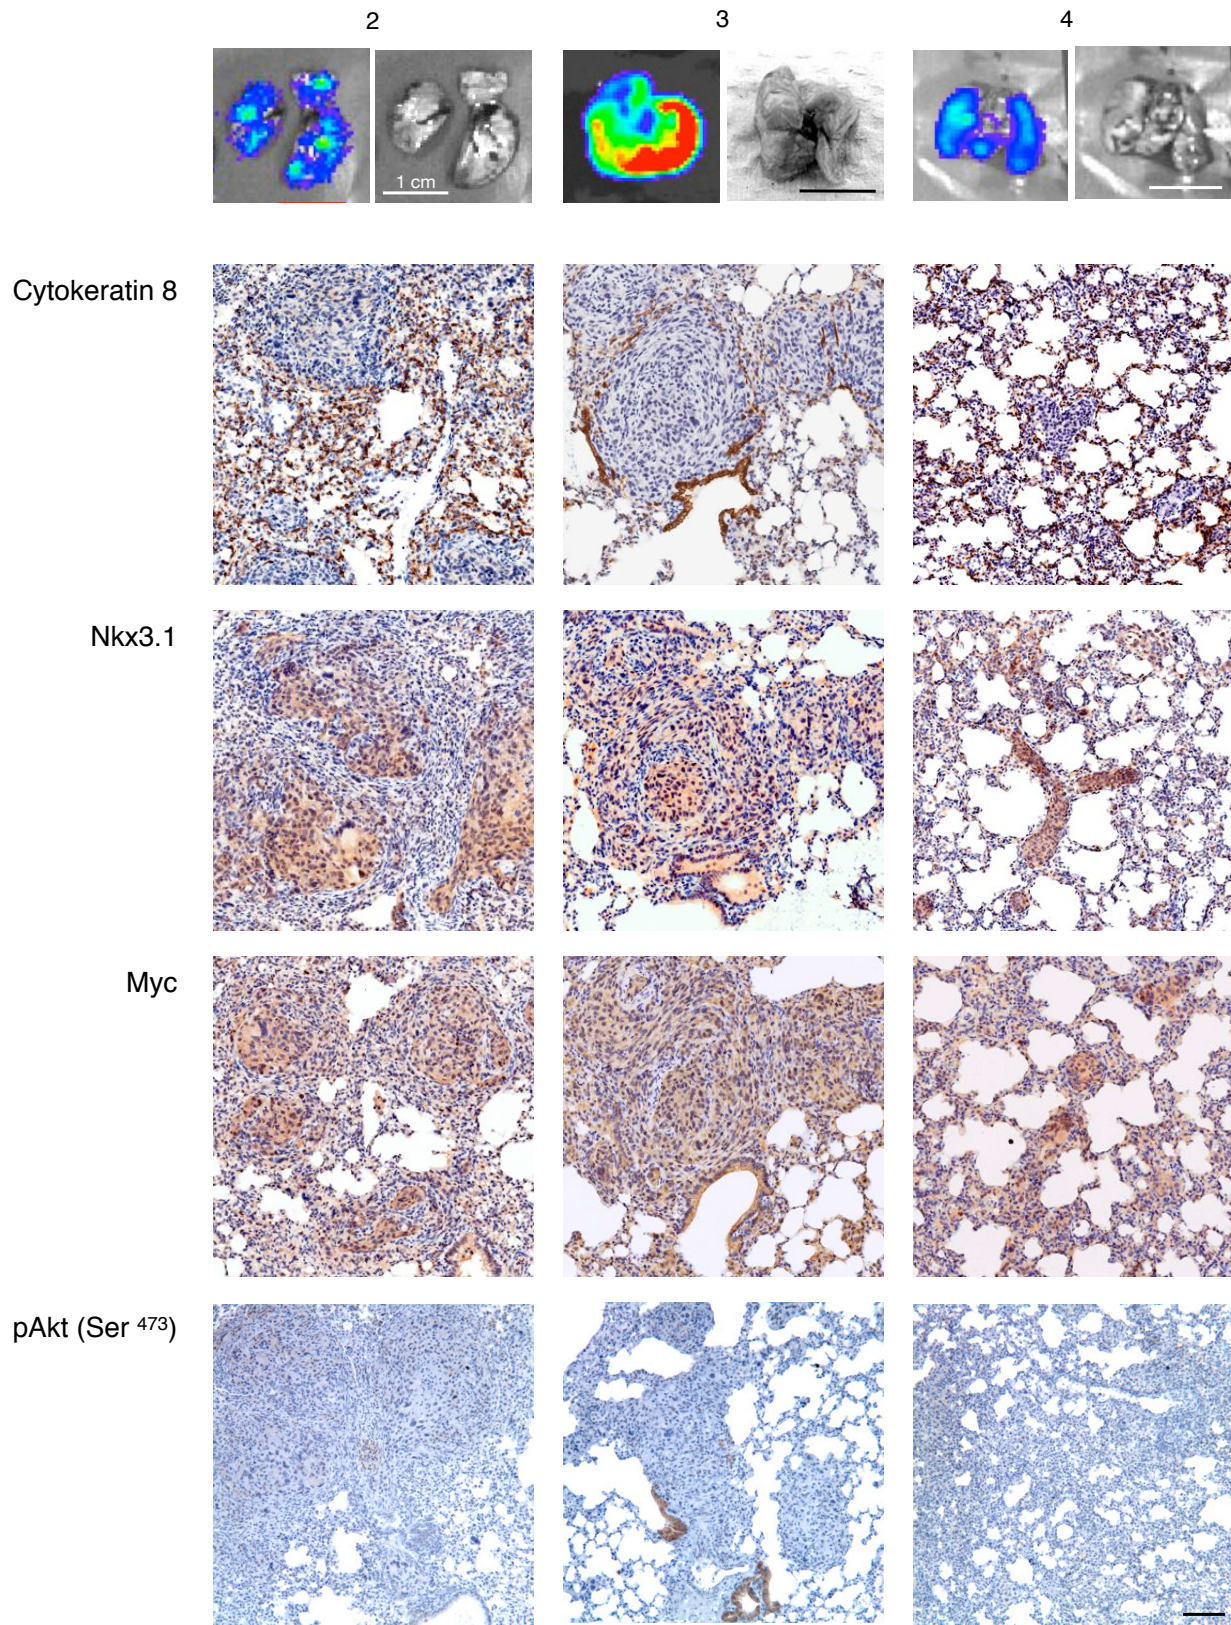

Supplement: NIHMS556897-supplement-S4.pdf [file NIHMS556897-supplement-S4.pdf]

Castration resistant prostate tumors

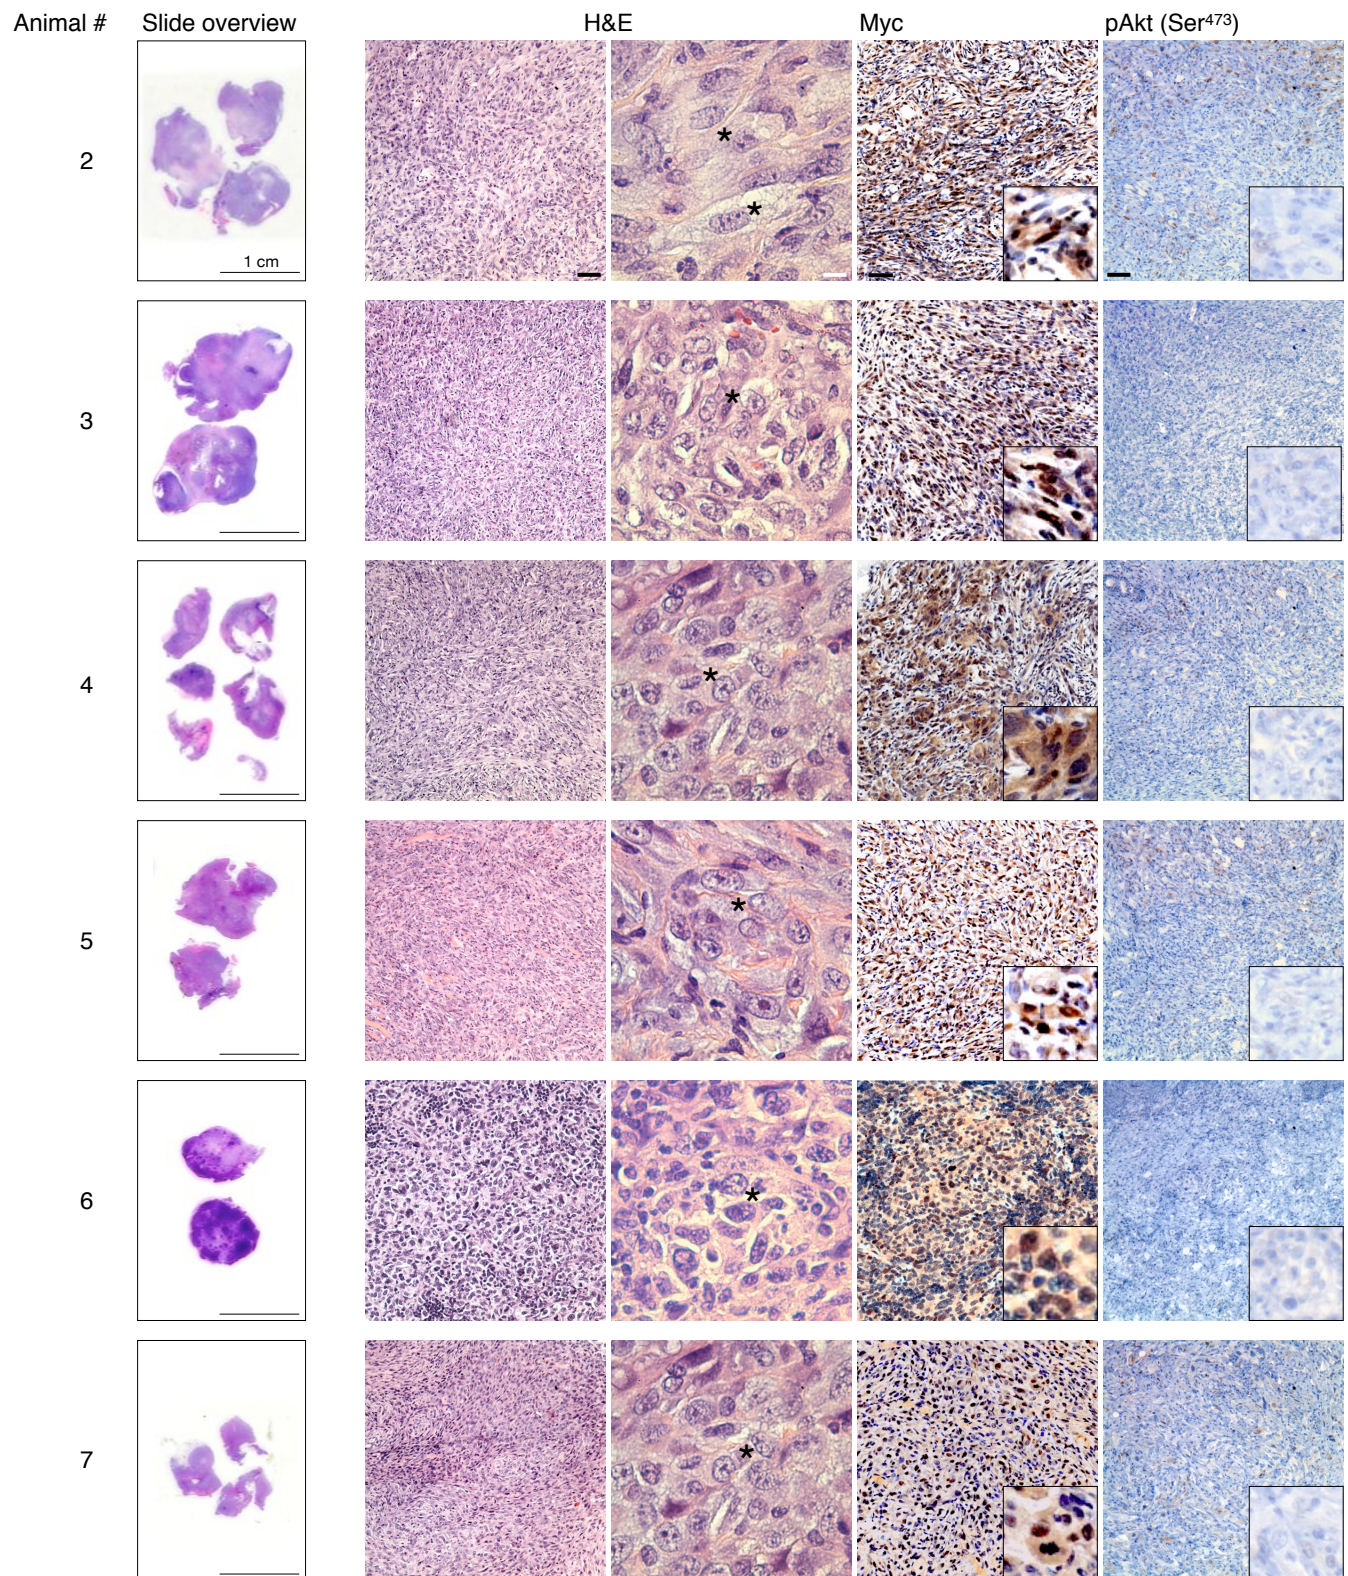

Supplement: NIHMS556897-supplement-S6.pdf [file NIHMS556897-supplement-S6.pdf]

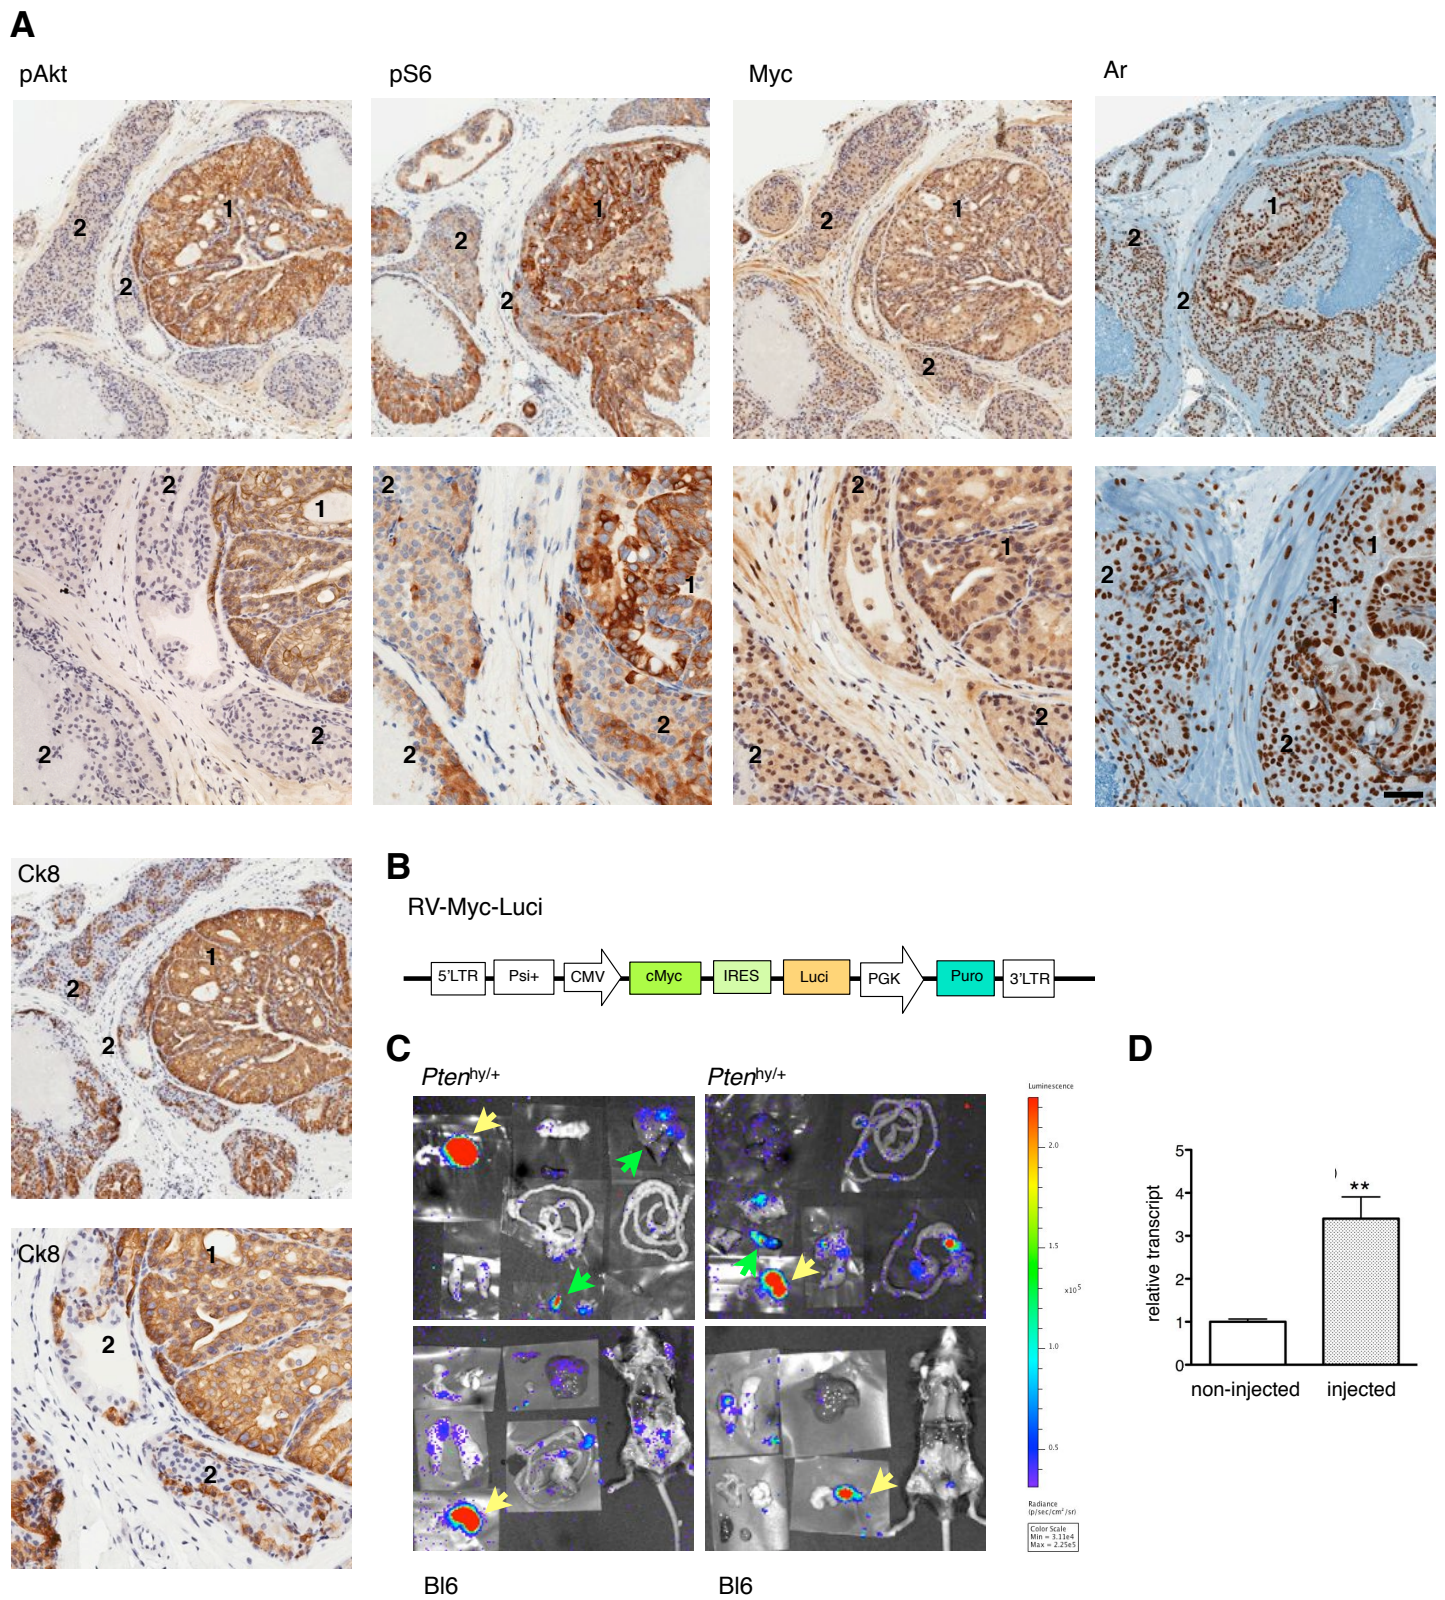

Supplement: NIHMS556897-supplement-S7.pdf [file NIHMS556897-supplement-S7.pdf]

**A**

JQ1 suppresses Myc transcription in RapidCaP

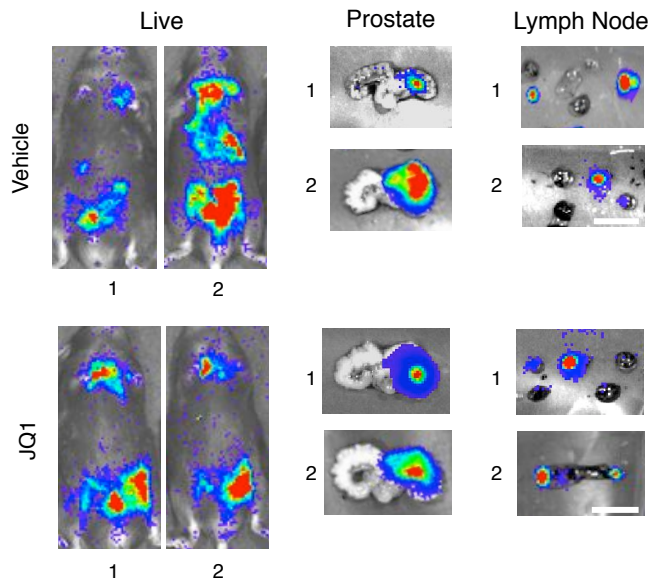**B**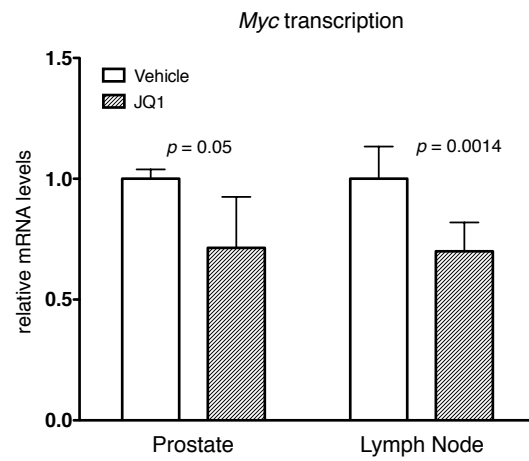

Supplement: NIHMS556897-supplement-S8.pdf [file NIHMS556897-supplement-S8.pdf]
